# Supplementary material
Source: MDPI journal article supplement (https://www.mdpi.com/2227-7390/9/23/3007)
Supplement: s1 [file s1]

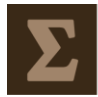

## Supplementary Material to

Realistic choice of annual matrices contracts the range of  $\lambda_S$  estimatesDmitrii O. Logofet <sup>1,\*</sup>, Leonid L. Golubyatnikov <sup>1</sup>, Elena S. Kazantseva <sup>2</sup>, and Nina G. Ulanova <sup>2</sup><sup>1</sup> Laboratory of Mathematical Ecology, A.M. Obukhov Institute of Atmospheric Physics, Russian Academy of Sciences, Moscow 119 017, Russia; [danilal@postman.ru](mailto:danilal@postman.ru), [golub@ifaran.ru](mailto:golub@ifaran.ru)<sup>2</sup> Biological Department, Moscow State University, Moscow, 119234, Russia; [nulanova@mail.ru](mailto:nulanova@mail.ru)\* Correspondence: [danilal@postman.ru](mailto:danilal@postman.ru)Supplementary to: Statistical Processing of Meteodata

The study allows us to conclude that the  $\lambda_1(t; a^\circ)$  variable correlates positively with the average minimum air temperatures in May–June, and it turns out to be the only significant predictor in the models with one factor included (**Table S1**).

**Table S1.** Results of regression models for the  $\lambda_1(t; a^\circ)$  series of *Eritrichium caucasicum*. Notations: n is the number of observations; df, the number of degrees of freedom;  $R^2$ , the coefficient of determination; total\_p, the significance level for the entire model; B, the regression coefficient; StE\_B, the regression coefficient error; p, the significance level for the factors; FR0, the number of days with freezing at the soil level; n.s., not significant; \*, the first level of significance (greater than 90%, less than 95%)

| Model       | n  | df | $R^2$ | total_p    | Factors     | B      | StE_B  | p      |
|-------------|----|----|-------|------------|-------------|--------|--------|--------|
| Min T 05-06 | 11 | 9  | 0.493 | 0.016*     | Min T 05-06 | 0.100  | 0.034  | 0.016* |
| FR0         | 8  | 6  | 0.497 | 0.051 n.s. | FR0         | 0.0073 | 0.0030 | 0.051  |

Supplementary to: Recovering the Transition Matrix from a Sequence of Chain States

A table below illustrates statements (4)–(7) of the main text with its green cells.

**Table S2.** Associating each successive point,  $\theta(k)$ ,  $k = 1960, \dots, 2019$ , of the temperature index time series to one of the 11 reference values

| $k \backslash t$ | $\theta(k) - \theta(t)$ |      |      |      |      |      |      |      |      |      |      | $ \theta(k) - \theta(t) $ | $t_{\text{next}}$ |
|------------------|-------------------------|------|------|------|------|------|------|------|------|------|------|---------------------------|-------------------|
|                  | 2009                    | 2010 | 2011 | 2012 | 2013 | 2014 | 2015 | 2016 | 2017 | 2018 | 2019 | $\min_t$                  |                   |
| 1960             | 2.0                     | -0.1 | 1.3  | -0.8 | -1.7 | -1.3 | 0.3  | 1.4  | 1.8  | -3.0 | -1.2 | 0.1                       | 2010              |
| 1961             | 6.4                     | 4.3  | 5.7  | 3.6  | 2.7  | 3.1  | 4.7  | 5.8  | 6.2  | 1.4  | 3.2  | 1.4                       | 2018              |
| 1962             | 4.3                     | 2.2  | 3.6  | 1.5  | 0.6  | 1.0  | 2.6  | 3.7  | 4.1  | -0.7 | 1.1  | 0.6                       | 2013              |
| 1963             | 5.0                     | 2.9  | 4.3  | 2.2  | 1.3  | 1.7  | 3.3  | 4.4  | 4.8  | 0.0  | 1.8  | 0.0                       | 2018              |
| 1964             | 3.6                     | 1.5  | 2.9  | 0.8  | -0.1 | 0.3  | 1.9  | 3.0  | 3.4  | -1.4 | 0.4  | 0.1                       | 2013              |
| 1965             | 6.9                     | 4.8  | 6.2  | 4.1  | 3.2  | 3.6  | 5.2  | 6.3  | 6.7  | 1.9  | 3.7  | 1.9                       | 2018              |
| 1966             | 0.4                     | -1.7 | -0.3 | -2.4 | -3.3 | -2.9 | -1.3 | -0.2 | 0.2  | -4.6 | -2.8 | 0.2                       | 2017              |
| 1967             | -2.2                    | -4.3 | -2.9 | -5.0 | -5.9 | -5.5 | -3.9 | -2.8 | -2.4 | -7.2 | -5.4 | 2.2                       | 2009              |
| 1968             | 0.4                     | -1.7 | -0.3 | -2.4 | -3.3 | -2.9 | -1.3 | -0.2 | 0.2  | -4.6 | -2.8 | 0.2                       | 2017              |
| 1969             | -1.1                    | -3.2 | -1.8 | -3.9 | -4.8 | -4.4 | -2.8 | -1.7 | -1.3 | -6.1 | -4.3 | 1.1                       | 2009              |
| 1970             | -0.4                    | -2.5 | -1.1 | -3.2 | -4.1 | -3.7 | -2.1 | -1.0 | -0.6 | -5.4 | -3.6 | 0.4                       | 2009              |
| 1971             | 1.9                     | -0.2 | 1.2  | -0.9 | -1.8 | -1.4 | 0.2  | 1.3  | 1.7  | -3.1 | -1.3 | 0.2                       | 2010              |
| 1972             | 1.3                     | -0.8 | 0.6  | -1.5 | -2.4 | -2.0 | -0.4 | 0.7  | 1.1  | -3.7 | -1.9 | 0.4                       | 2015              |
| 1973             | -0.9                    | -3.0 | -1.6 | -3.7 | -4.6 | -4.2 | -2.6 | -1.5 | -1.1 | -5.9 | -4.1 | 0.9                       | 2009              |
| 1974             | 0.3                     | -1.8 | -0.4 | -2.5 | -3.4 | -3.0 | -1.4 | -0.3 | 0.1  | -4.7 | -2.9 | 0.1                       | 2017              |
| 1975             | 1.8                     | -0.3 | 1.1  | -1.0 | -1.9 | -1.5 | 0.1  | 1.2  | 1.6  | -3.2 | -1.4 | 0.1                       | 2015              |
| 1976             | -1.9                    | -4.0 | -2.6 | -4.7 | -5.6 | -5.2 | -3.6 | -2.5 | -2.1 | -6.9 | -5.1 | 1.9                       | 2009              |
| 1977             | 0.5                     | -1.6 | -0.2 | -2.3 | -3.2 | -2.8 | -1.2 | -0.1 | 0.3  | -4.5 | -2.7 | 0.1                       | 2016              |
| 1978             | -0.1                    | -2.2 | -0.8 | -2.9 | -3.8 | -3.4 | -1.8 | -0.7 | -0.3 | -5.1 | -3.3 | 0.1                       | 2009              |
| 1979             | 3.1                     | 1.0  | 2.4  | 0.3  | -0.6 | -0.2 | 1.4  | 2.5  | 2.9  | -1.9 | -0.1 | 0.1                       | 2019              |
| 1980             | -0.3                    | -2.4 | -1.0 | -3.1 | -4.0 | -3.6 | -2.0 | -0.9 | -0.5 | -5.3 | -3.5 | 0.3                       | 2009              |
| 1981             | -0.6                    | -2.7 | -1.3 | -3.4 | -4.3 | -3.9 | -2.3 | -1.2 | -0.8 | -5.6 | -3.8 | 0.6                       | 2009              |
| 1982             | 0.5                     | -1.6 | -0.2 | -2.3 | -3.2 | -2.8 | -1.2 | -0.1 | 0.3  | -4.5 | -2.7 | 0.1                       | 2016              |
| 1983             | -1.6                    | -3.7 | -2.3 | -4.4 | -5.3 | -4.9 | -3.3 | -2.2 | -1.8 | -6.6 | -4.8 | 1.6                       | 2009              |
| 1984             | -0.4                    | -2.5 | -1.1 | -3.2 | -4.1 | -3.7 | -2.1 | -1.0 | -0.6 | -5.4 | -3.6 | 0.4                       | 2009              |
| 1985             | 1.2                     | -0.9 | 0.5  | -1.6 | -2.5 | -2.1 | -0.5 | 0.6  | 1.0  | -3.8 | -2.0 | 0.5                       | 2011              |
| 1986             | -4.3                    | -6.4 | -5.0 | -7.1 | -8.0 | -7.6 | -6.0 | -4.9 | -4.5 | -9.3 | -7.5 | 4.3                       | 2009              |
| 1987             | 1.9                     | -0.2 | 1.2  | -0.9 | -1.8 | -1.4 | 0.2  | 1.3  | 1.7  | -3.1 | -1.3 | 0.2                       | 2010              |
| 1988             | -4.5                    | -6.6 | -5.2 | -7.3 | -8.2 | -7.8 | -6.2 | -5.1 | -4.7 | -9.5 | -7.7 | 4.5                       | 2009              |
| 1989             | -1.5                    | -3.6 | -2.2 | -4.3 | -5.2 | -4.8 | -3.2 | -2.1 | -1.7 | -6.5 | -4.7 | 1.5                       | 2009              |
| 1990             | 0.5                     | -1.6 | -0.2 | -2.3 | -3.2 | -2.8 | -1.2 | -0.1 | 0.3  | -4.5 | -2.7 | 0.1                       | 2016              |
| 1991             | 0.8                     | -1.3 | 0.1  | -2.0 | -2.9 | -2.5 | -0.9 | 0.2  | 0.6  | -4.2 | -2.4 | 0.1                       | 2011              |
| 1992             | -1.7                    | -3.8 | -2.4 | -4.5 | -5.4 | -5.0 | -3.4 | -2.3 | -1.9 | -6.7 | -4.9 | 1.7                       | 2009              |
| 1993             | 1.5                     | -0.6 | 0.8  | -1.3 | -2.2 | -1.8 | -0.2 | 0.9  | 1.3  | -3.5 | -1.7 | 0.2                       | 2015              |
| 1994             | -1.2                    | -3.3 | -1.9 | -4.0 | -4.9 | -4.5 | -2.9 | -1.8 | -1.4 | -6.2 | -4.4 | 1.2                       | 2009              |
| 1995             | -0.2                    | -2.3 | -0.9 | -3.0 | -3.9 | -3.5 | -1.9 | -0.8 | -0.4 | -5.2 | -3.4 | 0.2                       | 2009              |
| 1996             | 2.2                     | 0.1  | 1.5  | -0.6 | -1.5 | -1.1 | 0.5  | 1.6  | 2.0  | -2.8 | -1.0 | 0.1                       | 2010              |
| 1997             | 1.2                     | -0.9 | 0.5  | -1.6 | -2.5 | -2.1 | -0.5 | 0.6  | 1.0  | -3.8 | -2.0 | 0.5                       | 2015              |
| 1998             | 2.2                     | 0.1  | 1.5  | -0.6 | -1.5 | -1.1 | 0.5  | 1.6  | 2.0  | -2.8 | -1.0 | 0.1                       | 2010              |
| 1999             | -4.1                    | -6.2 | -4.8 | -6.9 | -7.8 | -7.4 | -5.8 | -4.7 | -4.3 | -9.1 | -7.3 | 4.1                       | 2009              |
| 2000             | -1.1                    | -3.2 | -1.8 | -3.9 | -4.8 | -4.4 | -2.8 | -1.7 | -1.3 | -6.1 | -4.3 | 1.1                       | 2009              |
| 2001             | -1.6                    | -3.7 | -2.3 | -4.4 | -5.3 | -4.9 | -3.3 | -2.2 | -1.8 | -6.6 | -4.8 | 1.6                       | 2009              |
| 2002             | 1.0                     | -1.1 | 0.3  | -1.8 | -2.7 | -2.3 | -0.7 | 0.4  | 0.8  | -4.0 | -2.2 | 0.3                       | 2011              |
| 2003             | 0.5                     | -1.6 | -0.2 | -2.3 | -3.2 | -2.8 | -1.2 | -0.1 | 0.3  | -4.5 | -2.7 | 0.1                       | 2016              |
| 2004             | 1.8                     | -0.3 | 1.1  | -1.0 | -1.9 | -1.5 | 0.1  | 1.2  | 1.6  | -3.2 | -1.4 | 0.1                       | 2015              |
| 2005             | 1.7                     | -0.4 | 1.0  | -1.1 | -2.0 | -1.6 | 0.0  | 1.1  | 1.5  | -3.3 | -1.5 | 0.0                       | 2015              |
| 2006             | -0.7                    | -2.8 | -1.4 | -3.5 | -4.4 | -4.0 | -2.4 | -1.3 | -0.9 | -5.7 | -3.9 | 0.7                       | 2009              |
| 2007             | -2.6                    | -4.7 | -3.3 | -5.4 | -6.3 | -5.9 | -4.3 | -3.2 | -2.8 | -7.6 | -5.8 | 2.6                       | 2009              |
| 2008             | 0.5                     | -1.6 | -0.2 | -2.3 | -3.2 | -2.8 | -1.2 | -0.1 | 0.3  | -4.5 | -2.7 | 0.1                       | 2016              |
| 2009             | 0.0                     | -2.1 | -0.7 | -2.8 | -3.7 | -3.3 | -1.7 | -0.6 | -0.2 | -5.0 | -3.2 | 0.0                       | 2009              |
| 2010             | 2.1                     | 0.0  | 1.4  | -0.7 | -1.6 | -1.2 | 0.4  | 1.5  | 1.9  | -2.9 | -1.1 | 0.0                       | 2010              |
| 2011             | 0.7                     | -1.4 | 0.0  | -2.1 | -3.0 | -2.6 | -1.0 | 0.1  | 0.5  | -4.3 | -2.5 | 0.0                       | 2011              |
| 2012             | 2.8                     | 0.7  | 2.1  | 0.0  | -0.9 | -0.5 | 1.1  | 2.2  | 2.6  | -2.2 | -0.4 | 0.0                       | 2012              |
| 2013             | 3.7                     | 1.6  | 3.0  | 0.9  | 0.0  | 0.4  | 2.0  | 3.1  | 3.5  | -1.3 | 0.5  | 0.0                       | 2013              |
| 2014             | 3.3                     | 1.2  | 2.6  | 0.5  | -0.4 | 0.0  | 1.6  | 2.7  | 3.1  | -1.7 | 0.1  | 0.0                       | 2014              |
| 2015             | 1.7                     | -0.4 | 1.0  | -1.1 | -2.0 | -1.6 | 0.0  | 1.1  | 1.5  | -3.3 | -1.5 | 0.0                       | 2015              |
| 2016             | 0.6                     | -1.5 | -0.1 | -2.2 | -3.1 | -2.7 | -1.1 | 0.0  | 0.4  | -4.4 | -2.6 | 0.0                       | 2016              |
| 2017             | 0.2                     | -1.9 | -0.5 | -2.6 | -3.5 | -3.1 | -1.5 | -0.4 | 0.0  | -4.8 | -3.0 | 0.0                       | 2017              |
| 2018             | 5.0                     | 2.9  | 4.3  | 2.2  | 1.3  | 1.7  | 3.3  | 4.4  | 4.8  | 0.0  | 1.8  | 0.0                       | 2018              |
| 2019             | 3.2                     | 1.1  | 2.5  | 0.4  | -0.5 | -0.1 | 1.5  | 2.6  | 3.0  | -1.8 | 0.0  | 0.0                       | 2019              |
